# Supplementary material for: SMAX1/SMXL2 regulate root and root hair development downstream of KAI2-mediated signalling in Arabidopsis
Source: PubMed Central journal article supplement (PMC6738646; doi:10.1371/journal.pgen.1008327), 2019-08-29
Supplement: pgen.1008327.s008.pdf [file pgen.1008327.s008.pdf]

**Supplemental Table S1.** Summary of effects of *SMXL* mutations on *max2* root phenotypes.

|                      | <i>max2</i>  |              |                    |                  |
|----------------------|--------------|--------------|--------------------|------------------|
|                      | <i>smax1</i> | <i>smxl2</i> | <i>smax1 smxl2</i> | <i>smxl6,7,8</i> |
| Lateral root density |              |              | +                  | +                |
| Root hair density    | -            | -            | +                  | -                |
| Root hair length     | -            | -            | +                  | -                |
| Root skewing         | +            | +            | +                  | +/-              |
| Root straightness    | -            | -            | +                  | -                |
| Root diameter        | +            | -            | +                  | -                |

† Suppression of *max2* phenotypes

- No suppression of *max2* phenotypes

+/- Opposite effects in Munich (+) and Leeds (-)
